# Supplementary material for: Nanomicelles-in-coaxial nanofibers with exit channels as a transdermal delivery platform for smoking cessation
Source: Royal Society of Chemistry journal article supplement (doi:10.1039/d2tb00818a), 2022-01-01
Supplement: d2tb00818a1.pdf [file d2tb00818a1.pdf]

## **Nanomicelles-in-Coaxial Nanofibers with Exit Channels as Transdermal Delivery Platform for Smoking Cessation**

**Sarah Yahia,<sup>a</sup> Ahmed S. Abo Dena,<sup>a,b</sup> Rasha M. El Nashar<sup>c</sup> and Ibrahim M. El-Sherbiny<sup>\*a</sup>**

<sup>a</sup> Nanomedicine Lab, Center for Materials Science (CMS), Zewail City of Science and Technology, 6<sup>th</sup> of October, Giza 12578, Egypt

<sup>b</sup> Pharmaceutical Chemistry Department, National Organization for Drug Control and Research (NODCAR), Giza, Egypt

<sup>c</sup> Chemistry Department, Faculty of Science, Cairo University, Giza 12613, Egypt

### **Supplementary Materials**

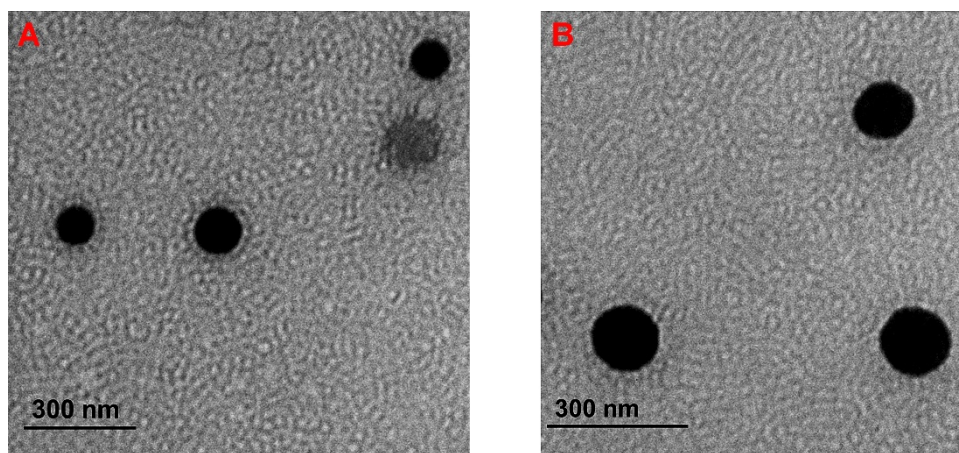

**Figure S1.** Transmission electron micrographs of plain (A) and VAR-loaded (B) pluronic F127 NPs. It could be noticed that the drug-loaded nanoparticles are slightly larger in size than plain nanoparticles.

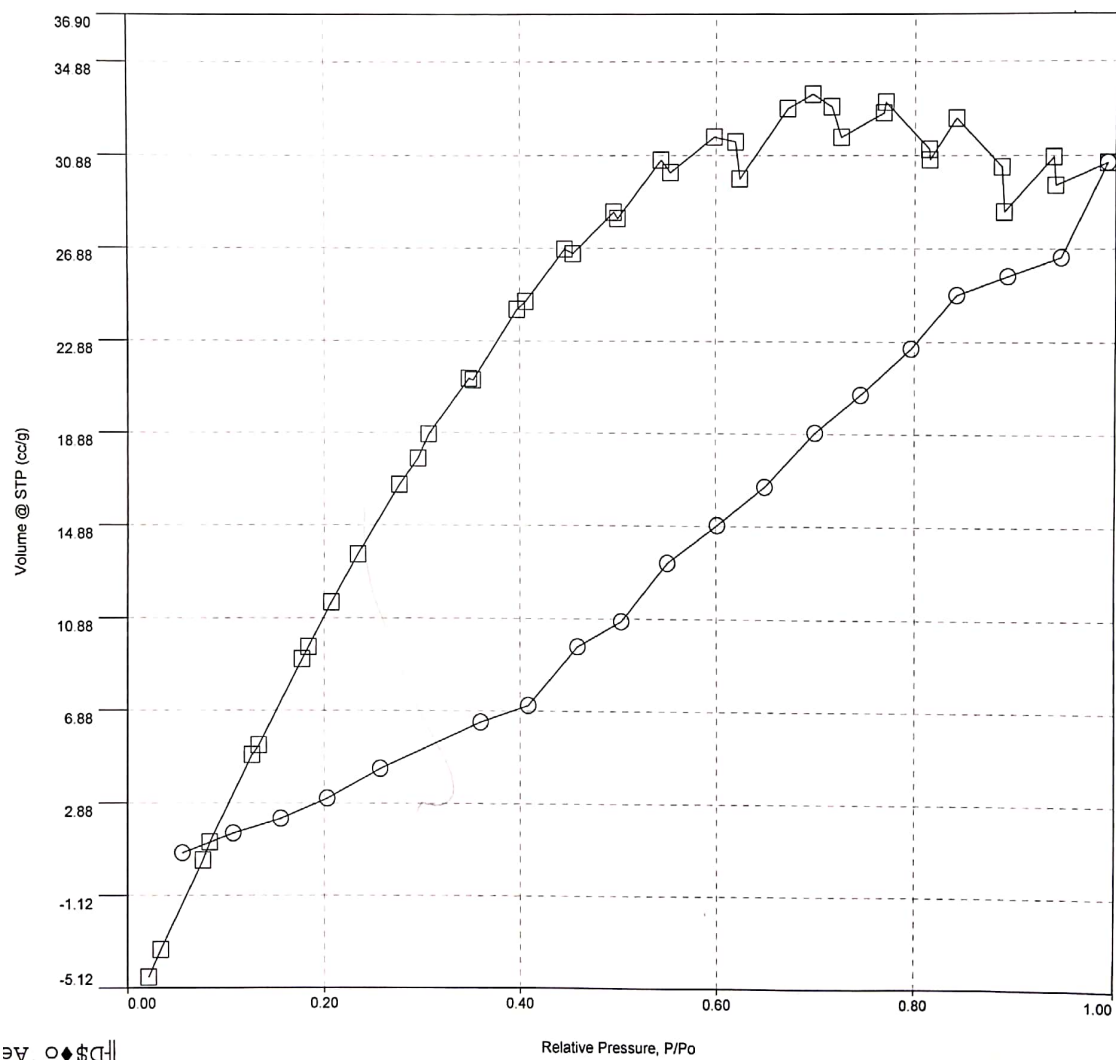

**Figure S2.** BET isotherm of sample I.

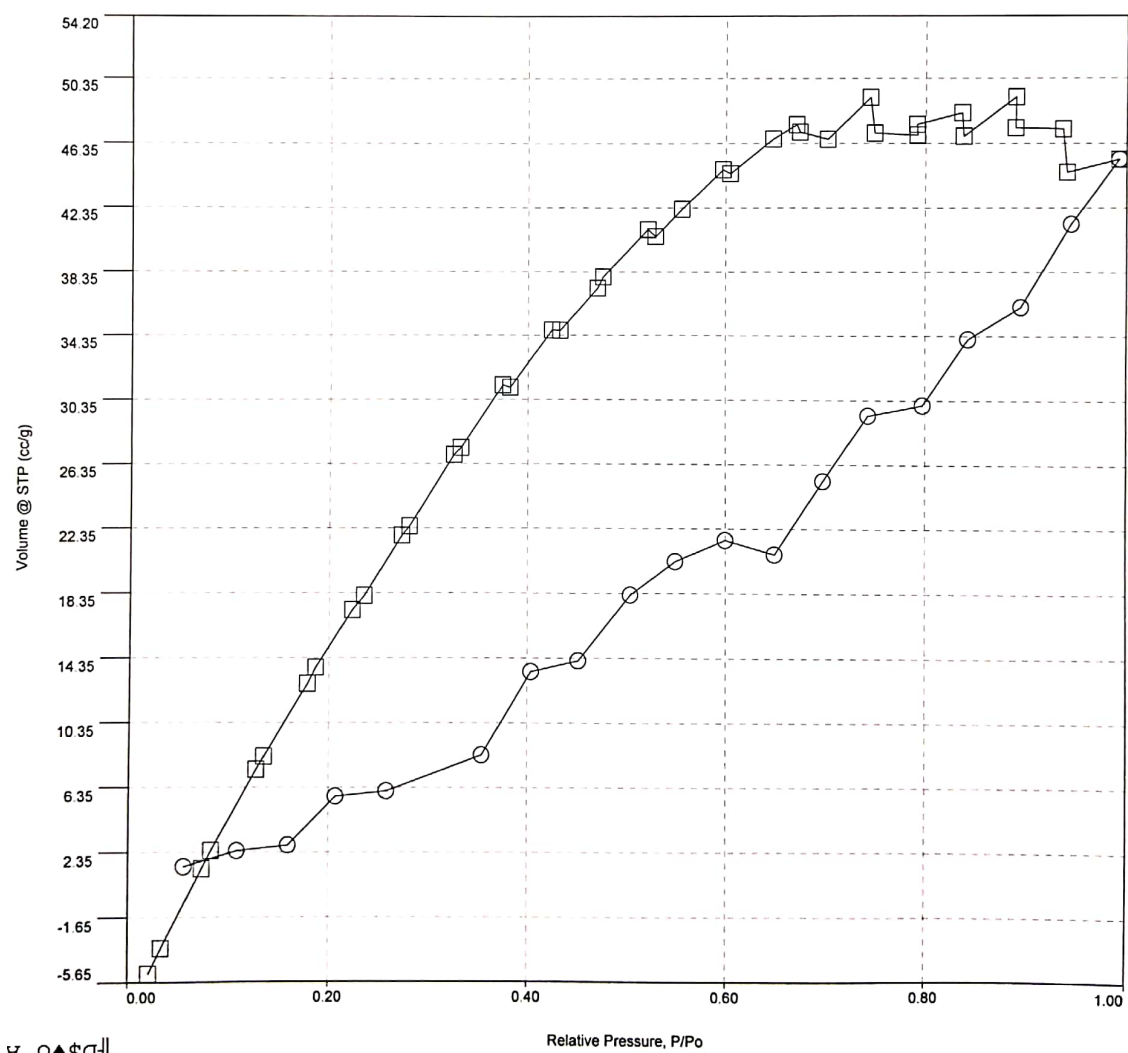

**Figure S3.** BET isotherm of sample II.

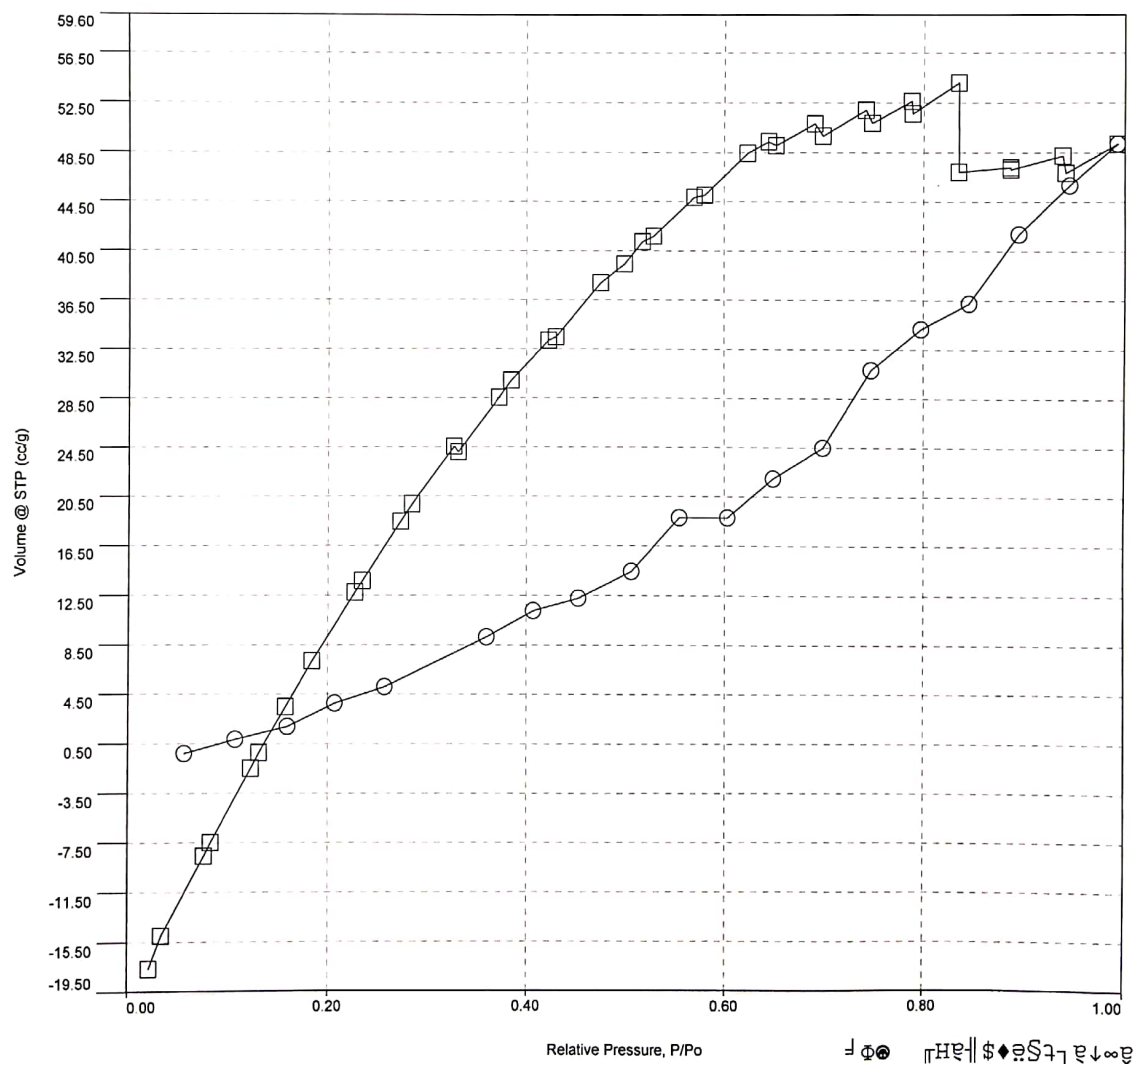

**Figure S4.** BET isotherm of sample III.

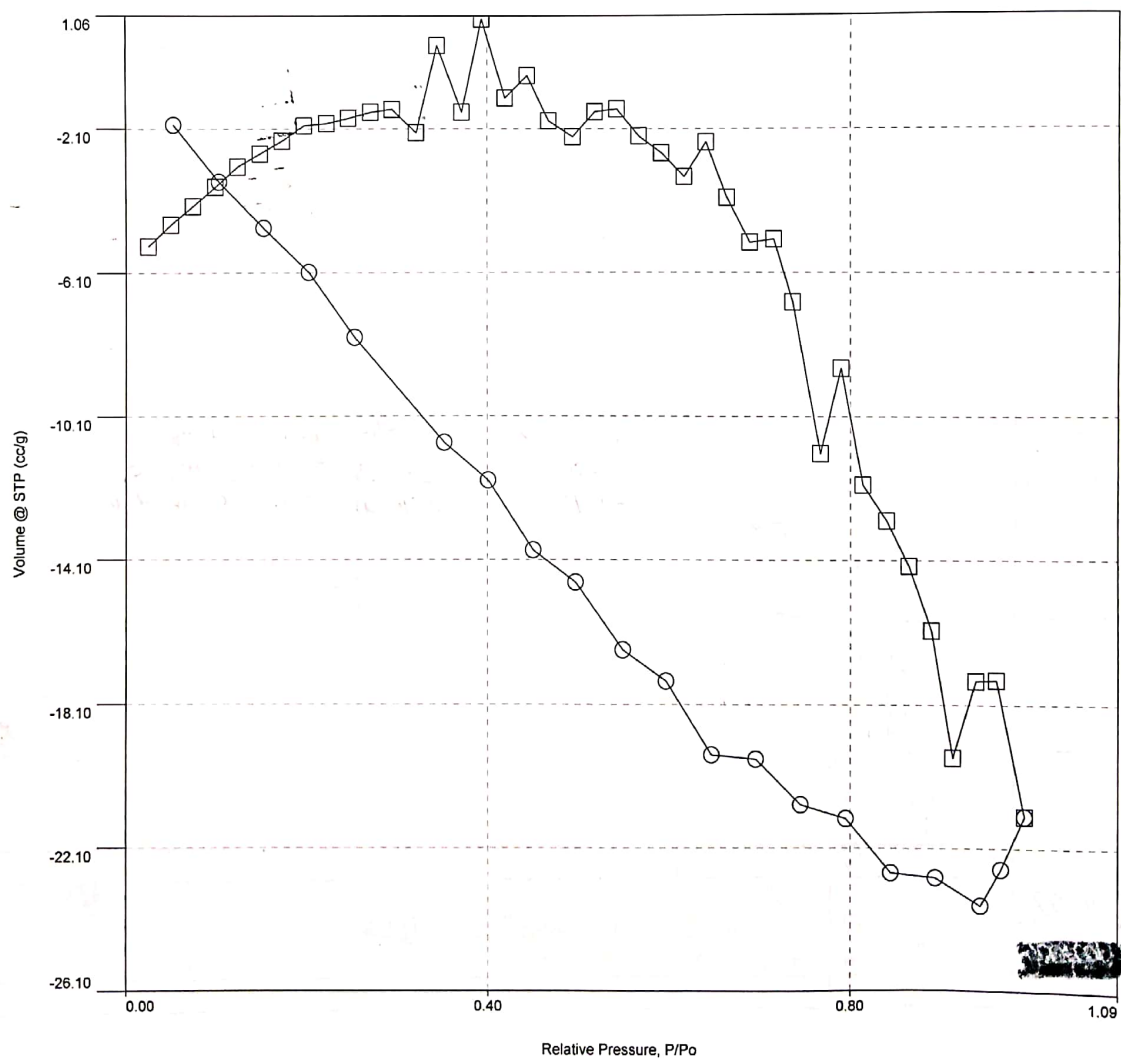

Figure S5. BET isotherm of sample IV.

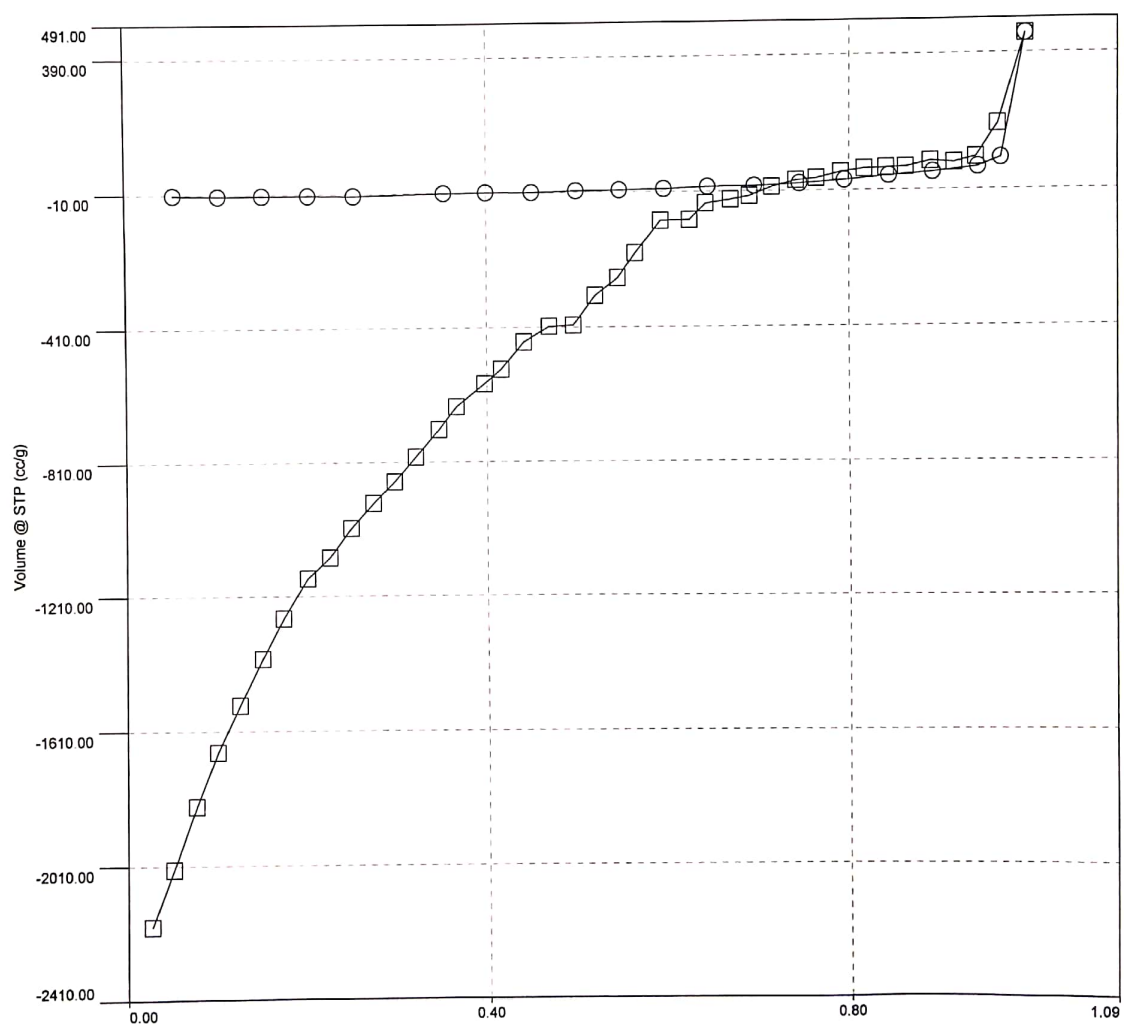

**Figure S6.** BET isotherm of sample V.

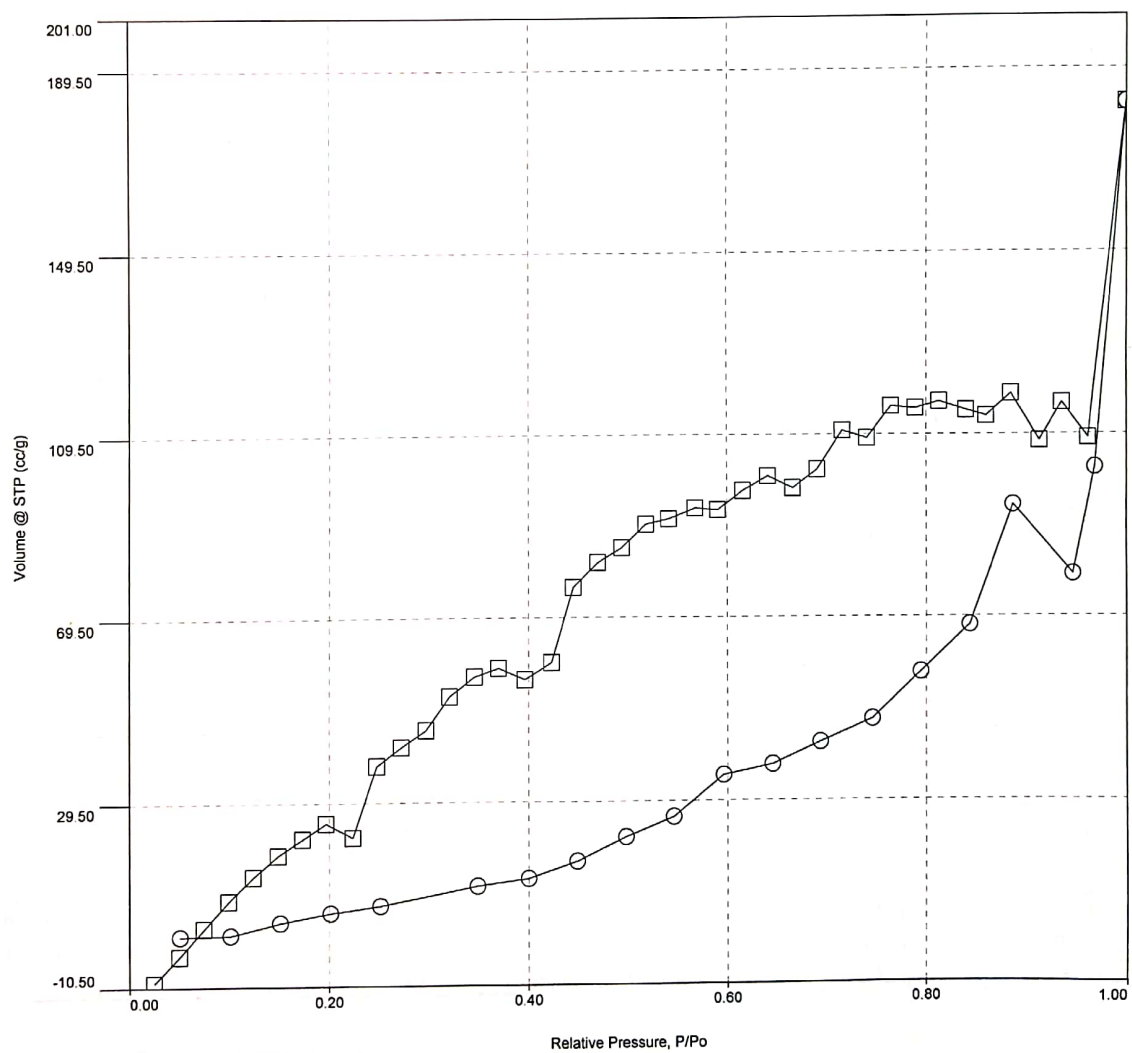

**Figure S7.** BET isotherm of sample VI.
